# Supplementary material for: Botrytis cinerea Airborne Conidia and Their Germination Ability Assessed by Immunological Methods in a NW Spain Vineyard
Source: MDPI journal article supplement (doi:10.3390/agronomy11071441), 2021-07-20
Supplement: s1 [file s1]

**Table S1.** Data of airborne *B. cinerea* conidia concentrations (Spores, in spores/m<sup>3</sup>), protein concentrations (Protein, in ng/m<sup>3</sup>), mean temperature in °C (Tmean) and rainfall in L/m<sup>2</sup> (Rain) during the study period in 2017. Data used in Figure 4a.

| 2017      |        |         |       |       |
|-----------|--------|---------|-------|-------|
| Date      | Spores | Protein | Tmean | Rain  |
| 4-May-17  | 45     | 0.298   | 18.94 | 0.00  |
| 5-May-17  | 67     | 0.275   | 13.28 | 9.00  |
| 6-May-17  | 42     | 0.243   | 15.08 | 2.80  |
| 7-May-17  | 83     | 0.289   | 19.01 | 0.00  |
| 8-May-17  | 120    | 0.272   | 20.46 | 0.00  |
| 9-May-17  | 162    | 0.359   | 17.86 | 2.80  |
| 10-May-17 | 269    | 0.292   | 14.49 | 14.00 |
| 11-May-17 | 77     | 0.255   | 12.97 | 33.20 |
| 12-May-17 | 100    | 0.258   | 13.52 | 9.20  |
| 13-May-17 | 288    | 0.268   | 13.56 | 16.00 |
| 14-May-17 | 178    | 0.270   | 17.02 | 0.00  |
| 15-May-17 | 252    | 0.246   | 20.25 | 0.00  |
| 16-May-17 | 319    | 0.412   | 22.37 | 0.00  |
| 17-May-17 | 259    | 0.265   | 18.32 | 0.00  |
| 18-May-17 | 112    | 0.266   | 13.44 | 0.00  |
| 19-May-17 | 96     | 0.248   | 13.37 | 0.00  |
| 20-May-17 | 134    | 0.259   | 17.79 | 0.00  |
| 21-May-17 | 185    | 0.290   | 21.35 | 0.00  |
| 22-May-17 | 197    | 0.381   | 21.76 | 0.00  |
| 23-May-17 | 120    | 0.339   | 23.04 | 0.00  |
| 24-May-17 | 125    | 0.298   | 25.59 | 0.00  |
| 25-May-17 | 171    | 0.238   | 20.57 | 8.80  |
| 26-May-17 | 129    | 0.244   | 17.72 | 24.20 |
| 29-May-17 | 235    | 0.251   | 17.86 | 0.00  |
| 30-May-17 | 227    | 0.268   | 18.48 | 0.00  |
| 2-Jun-17  | 260    | 0.283   | 18.70 | 0.00  |
| 3-Jun-17  | 177    | 0.251   | 16.21 | 0.00  |
| 4-Jun-17  | 112    | 0.264   | 16.44 | 0.00  |
| 5-Jun-17  | 186    | 0.259   | 15.83 | 1.40  |
| 6-Jun-17  | 107    | 0.267   | 17.33 | 0.00  |
| 7-Jun-17  | 203    | 0.267   | 19.97 | 0.00  |
| 8-Jun-17  | 237    | 0.279   | 19.94 | 0.00  |
| 9-Jun-17  | 140    | 0.240   | 20.22 | 0.00  |
| 10-Jun-17 | 165    | 0.250   | 21.51 | 0.00  |
| 11-Jun-17 | 94     | 0.248   | 20.21 | 0.00  |

**Table S2.** Date of start and end of the phenological stages 61, 65 and 69 (BBCH scale) of the considered grapevine varieties 'Treixadura', 'Godello', 'Loureira' and 'Albariño' in 2017. Data used in Figure 4a.

| 2017       |       |        |        |
|------------|-------|--------|--------|
| Variety    | Stage | Start  | End    |
| Treixadura | 61    | 13-May | 20-May |
|            | 65    | 21-May | 23-May |
|            | 69    | 24-May | 04-Jun |
| Godello    | 61    | 11-May | 19-May |
|            | 65    | 20-May | 21-May |
|            | 69    | 22-May | 25-May |
| Loureira   | 61    | 20-May | 25-May |
|            | 65    | 26-May | 27-May |
|            | 69    | 28-May | 11-Jun |
| Albariño   | 61    | 07-May | 13-May |
|            | 65    | 14-May | 16-May |
|            | 69    | 17-May | 22-May |

**Table S3.** Data of airborne *B. cinerea* conidia concentrations (Spores, in spores/m<sup>3</sup>), protein concentrations (Protein, in ng/m<sup>3</sup>), mean temperature in °C (Tmean) and rainfall in L/m<sup>2</sup> (Rain) during the study period in 2018. Data used in Figure 4b.

| 2018      |        |         |       |       |
|-----------|--------|---------|-------|-------|
| Date      | Spores | Protein | Tmean | Rain  |
| 1-Jun-18  | 151    | 0.314   | 14.93 | 0.00  |
| 2-Jun-18  | 224    | 0.275   | 16.33 | 0.00  |
| 3-Jun-18  | 125    | 0.256   | 15.14 | 0.00  |
| 4-Jun-18  | 120    | 0.283   | 13.08 | 6.40  |
| 5-Jun-18  | 110    | 0.244   | 12.91 | 5.40  |
| 6-Jun-18  | 161    | 0.224   | 15.96 | 0.00  |
| 7-Jun-18  | 275    | 0.273   | 14.48 | 2.60  |
| 9-Jun-18  | 360    | 0.222   | 13.36 | 17.40 |
| 10-Jun-18 | 215    | 0.323   | 15.10 | 3.80  |
| 11-Jun-18 | 153    | 0.237   | 15.35 | 1.00  |
| 12-Jun-18 | 279    | 0.235   | 16.94 | 0.00  |
| 13-Jun-18 | 495    | 0.268   | 17.05 | 0.00  |
| 14-Jun-18 | 366    | 0.322   | 18.44 | 0.00  |
| 15-Jun-18 | 369    | 0.229   | 19.41 | 0.00  |
| 16-Jun-18 | 307    | 0.223   | 18.52 | 0.00  |
| 17-Jun-18 | 316    | 0.243   | 21.21 | 0.00  |
| 18-Jun-18 | 238    | 0.246   | 22.47 | 0.00  |
| 19-Jun-18 | 282    | 0.305   | 23.96 | 0.00  |
| 20-Jun-18 | 269    | 0.245   | 23.39 | 0.00  |
| 21-Jun-18 | 276    | 0.331   | 23.24 | 3.00  |
| 22-Jun-18 | 367    | 0.239   | 22.43 | 0.00  |
| 23-Jun-18 | 303    | 0.282   | 25.35 | 0.00  |
| 24-Jun-18 | 352    | 0.272   | 26.61 | 0.00  |
| 25-Jun-18 | 144    | 0.271   | 21.86 | 0.00  |
| 26-Jun-18 | 103    | 0.312   | 18.52 | 0.00  |
| 27-Jun-18 | 179    | 0.289   | 19.69 | 0.00  |
| 28-Jun-18 | 446    | 0.255   | 19.10 | 0.00  |
| 29-Jun-18 | 446    | 0.280   | 19.86 | 1.20  |
| 30-Jun-18 | 131    | 0.218   | 17.14 | 37.40 |

**Table S4.** Date of start and end of the phenological stages 61, 65 and 69 (BBCH scale) of the considered grapevine varieties 'Treixadura', 'Godello', 'Loureira' and 'Albariño' in 2018. Data used in Figure 4b.

| 2018       |       |        |        |
|------------|-------|--------|--------|
| Variety    | Stage | Start  | End    |
| Treixadura | 61    | 03-Jun | 14-Jun |
|            | 65    | 15-Jun | 17-Jun |
|            | 69    | 18-Jun | 22-Jun |
| Godello    | 61    | 02-Jun | 11-Jun |
|            | 65    | 12-Jun | 15-Jun |
|            | 69    | 16-Jun | 17-Jun |
| Loureira   | 61    | 06-Jun | 13-Jun |
|            | 65    | 14-Jun | 16-Jun |
|            | 69    | 17-Jun | 18-Jun |
| Albariño   | 61    | 02-Jun | 09-Jun |
|            | 65    | 10-Jun | 14-Jun |
|            | 69    | 15-Jun | 19-Jun |

**Table S5.** Data of *B. cinerea* airborne protein concentrations of 2018 (Protein), and forecast values for the same year obtained from the developed regression model (Estimated). Protein values are expressed in ng/m<sup>3</sup>. Data used in Figure 7.

| Date      | Protein | Estimated |
|-----------|---------|-----------|
| 1-Jun-18  | 0.3137  | 0.2804    |
| 2-Jun-18  | 0.2750  | 0.2810    |
| 3-Jun-18  | 0.2556  | 0.2636    |
| 4-Jun-18  | 0.2828  | 0.2477    |
| 5-Jun-18  | 0.2440  | 0.2487    |
| 6-Jun-18  | 0.2242  | 0.2619    |
| 7-Jun-18  | 0.2734  | 0.2854    |
| 9-Jun-18  | 0.2224  | 0.3137    |
| 10-Jun-18 | 0.3232  | 0.2743    |
| 11-Jun-18 | 0.2367  | 0.2445    |
| 12-Jun-18 | 0.2350  | 0.2903    |
| 13-Jun-18 | 0.2678  | 0.3686    |
| 14-Jun-18 | 0.3222  | 0.3281    |
| 15-Jun-18 | 0.2286  | 0.3163    |
| 16-Jun-18 | 0.2226  | 0.3035    |
| 17-Jun-18 | 0.2428  | 0.3317    |
| 18-Jun-18 | 0.2462  | 0.3130    |
| 19-Jun-18 | 0.3049  | 0.3045    |
| 20-Jun-18 | 0.2449  | 0.2966    |
| 21-Jun-18 | 0.3313  | 0.2941    |
| 22-Jun-18 | 0.2392  | 0.3039    |
| 23-Jun-18 | 0.2820  | 0.2922    |
| 24-Jun-18 | 0.2722  | 0.2890    |
| 25-Jun-18 | 0.2709  | 0.2177    |
| 26-Jun-18 | 0.3119  | 0.2001    |
| 27-Jun-18 | 0.2887  | 0.2333    |
| 28-Jun-18 | 0.2553  | 0.2816    |
| 29-Jun-18 | 0.2796  | 0.2886    |
| 30-Jun-18 | 0.2177  | 0.2115    |
